# Supplementary material for: PVDF microspheres@PLLA nanofibers-based hybrid tribo/piezoelectric nanogenerator with excellent electrical output properties
Source: Royal Society of Chemistry journal article supplement (doi:10.1039/d1ma00464f), 2021-01-01
Supplement: d1ma00464f1.pdf [file d1ma00464f1.pdf]

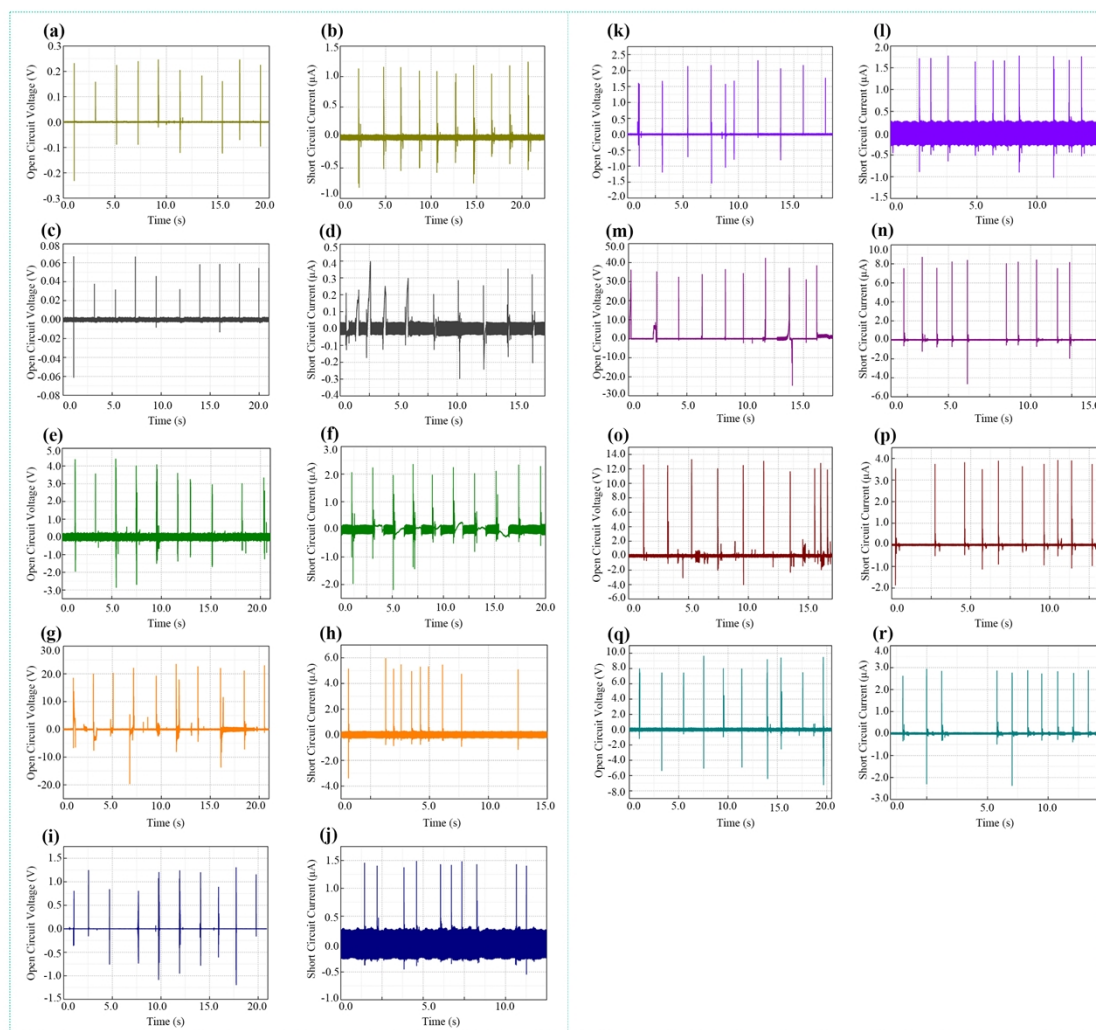

**Figure 1.** Electrical output properties of different specimens: (a, b) Open-circuit voltage and short-circuit current of specimen Y1, respectively. (c, d) Open-circuit voltage and short-circuit current of specimen Y2, respectively. (e, f) Open-circuit voltage and short-circuit current of specimen Y3, respectively. (g, h) Open-circuit voltage and short-circuit current of specimen Y4, respectively. (i, j) Open-circuit voltage and short-circuit current of specimen Y5, respectively. (k, l) Open-circuit voltage and short-circuit current of specimen Y6, respectively. (m, n) Open-circuit voltage and short-circuit current of specimen Y7, respectively. (o, p) Open-circuit voltage and short-circuit current of specimen Y8, respectively. (q, r) Open-circuit voltage and short-circuit current of specimen Y9, respectively.
